# Supplementary material
Source: PubMed Central journal article supplement (PMC3512062)
Supplement: supp_en.2012-1670v1_EN-12-1670figs5tabs2.pdf [file supp_en.2012-1670v1_EN-12-1670figs5tabs2.pdf]

## Supplemental Data

### *Supplemental Figure Legends*

**Figure S1. Changes of Scribble expression and localization in the seminiferous epithelium of rat testes after adjuvin treatment.** Rats ( $n = 3$  rats per time point) treated with a single dose of adjuvin (50 mg/kg b.w.) by gavage at time 0h (control) and terminated at specified time points thereafter at 6h, 12h, 2D (day) and 4D. Testes were fixed in Bouin's fixative, embedded in paraffin, and cross-sections (5  $\mu\text{m}$  thickness) were obtained with a microtome and process for immunohistochemistry. Scribble appears as reddish-brown immunoreactive substances in the seminiferous epithelium near the basement membrane, consistent with its localization at the BTB; and negative control using goat IgG (Gt IgG) was shown. A considerable time-dependent loss of Scribble at the BTB was detected. The boxed area in each micrograph was magnified and shown in an inset of the corresponding micrograph annotated from *i* to *v*. Scale bar = 40  $\mu\text{m}$ , which applies to remaining micrographs; scale bar in inset in *i* = 20  $\mu\text{m}$ , which also applies to other insets in *ii-v*.

**Figure S2. Imaging analysis to assess changes in the expression of Scribble versus ZO-1 at the BTB during adjuvin-induced germ cell loss from the seminiferous epithelium of adult rat testes.** The histogram shown herein summarized findings shown in Fig. 2E (see *main text*) using dual-labeled immunofluorescence analysis, illustrating the adjuvin-induced down-regulation of Scribble at the BTB in the seminiferous epithelium was associated with an up-regulation of ZO-1 based on imaging analysis as described in *Materials and Methods*. Each bar = mean $\pm$ SD of  $n = 80$  tubules randomly selected from 3 rat testes which had received a single dose of adjuvin at 50 mg/kg b.w. by gavage at time 0, and rats were euthanized at specified time points. Normal rats at time 0 was arbitrary set at 1 and served as the control against which statistical analysis was performed \*,  $P < 0.05$ ; \*\*,  $P < 0.01$ .

**Figure S3. An *in vitro* study to examine the expression of Scribble complex components after treatment of Sertoli cells with adjuvin.** Sertoli cells were cultured alone for 4 days to form an intact epithelium with an established TJ-permeability barrier that mimicked the Sertoli cell BTB *in vivo*, possessing ultrastructures of TJ, basal ES, gap junction and desmosome under electron microscopy. Thereafter, these cells were treated with adjuvin at 1  $\mu\text{g}/\text{ml}$  and terminated at specified time points vs. vehicle control (ethanol). This concentration was selected based on recent studies illustrating that at this dose, it promoted the Sertoli cell TJ-permeability barrier function (Su et al., 2010). (A) Immunoblotting (top panel) using SC lysates obtained from cultures at specified time points after treatment with adjuvin (1  $\mu\text{g}/\text{ml}$ ) with actin served as a protein loading control. The steady-state level of Scribble was found to

decline significantly *vs.* the vehicle control. The lower panel summarizes results of the immunoblotting in which the Scribble protein level at 0 h was arbitrarily set as 1. (B) Changes in the steady-state mRNA levels of Lgl2 and Dlg1 after adjuvin treatment was analyzed by RT-PCR in Sertoli cells with S-16 served as an internal control. The expression of Lgl2 and Dlg1 was down-regulated after adjuvin treatment *vs.* the vehicle control. Histograms in (B) summarize results of RT-PCR shown in the top panel. Each bar = mean $\pm$ SD of  $n = 3$  experiments using different Sertoli cell cultures. \*,  $P < 0.05$ ; \*\*,  $P < 0.01$  in which each treated group was compared with its corresponding control by ANOVA.

**Figure S4. A study to assess any changes in BTB-associated proteins in Sertoli cell epithelium following specific knockdown of different components of the Scribble protein complex by RNAi.**

These histograms summarize results of immunoblotting shown in Fig. 3, illustrating no changes were detected in the steady-state levels of: (A) integral membrane proteins (*e.g.*, occludin, JAM-A) and adaptor protein ZO-1 at the TJ, (B) integral membrane protein N-cadherin and adaptor proteins (*e.g.*,  $\alpha$ -catenin,  $\beta$ -catenin,  $\gamma$ -catenin) at the basal ES, and (C) polarity proteins (*e.g.*, aPKC, PAR3, PAR6 of the Par-based polarity protein complex) at the Sertoli cell BTB after single knockdown of Scribble, Lgl2 or Dlg1, and Scribble, Lgl2 and Dlg1 (SLD) triple-knockdown *versus* non-targeting control. Each bar = mean $\pm$ SD of  $n = 3$  independent experiments using different batches of Sertoli cell cultures for corresponding knockdown experiments. Target protein levels in controls were arbitrary set at 1 against which statistical analysis was compared between treatment and control groups. No statistical significance differences were found.

**Figure S5. Changes in the distribution of occludin at the BTB in the seminiferous epithelium of stage V-VI tubules after knockdown of different Scribble complex components in adult rat testes *in vivo*.** Expression of Scribble (green) in the seminiferous epithelium from rats of the Scribble single-knockdown (but not Lgl2 single-knockdown) and SLD triple-knockdown groups was found to be reduced *vs.* the non-targeting control group in stage V-VI tubules. However, expression of occludin (red) at the BTB near the basement membrane of the seminiferous epithelium remained relatively unaltered among all groups. Nuclei were stained with DAPI (blue). Scale bar = 80  $\mu$ m, which applies to all remaining micrographs.

## Reference

Su, L., Cheng, C. Y. and Mruk, D. D. (2010) Adjuvin-mediated Sertoli-germ cell junction disassembly affects Sertoli cell barrier function *in vitro* and *in vivo*. *Int J Biochem Cell Biol* **42**: 1864-1875.

Figure S1 (Su et al.)

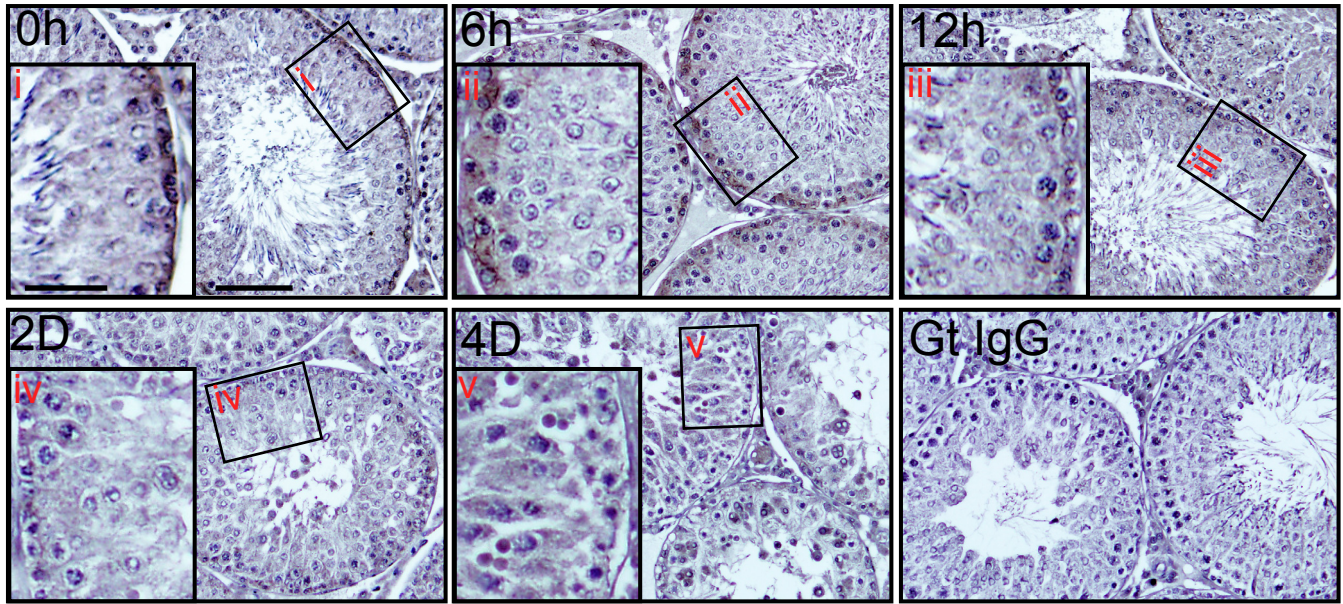

Figure S2 (Su et al.)

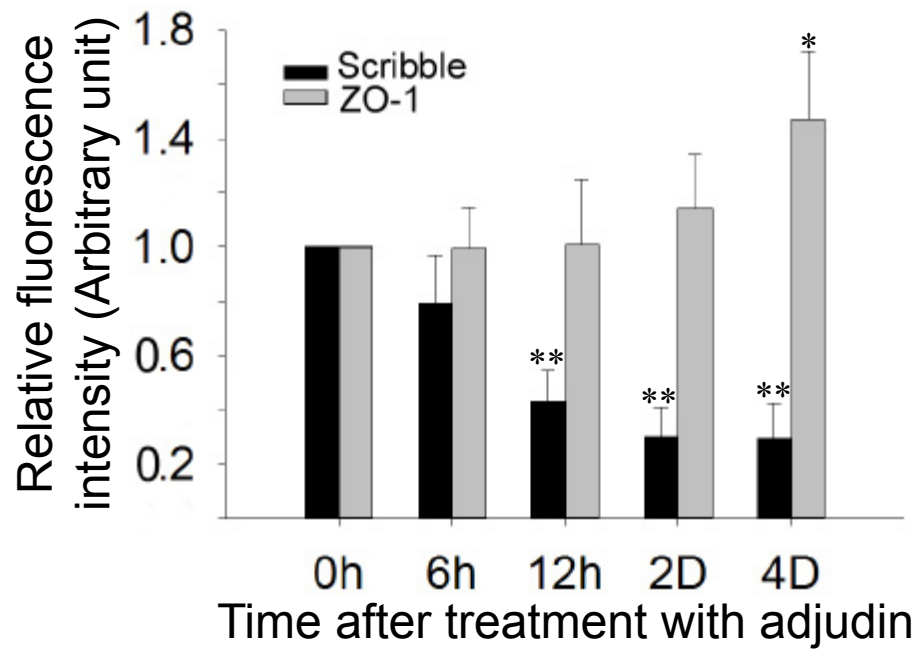

Figure S3 (Su et al.)

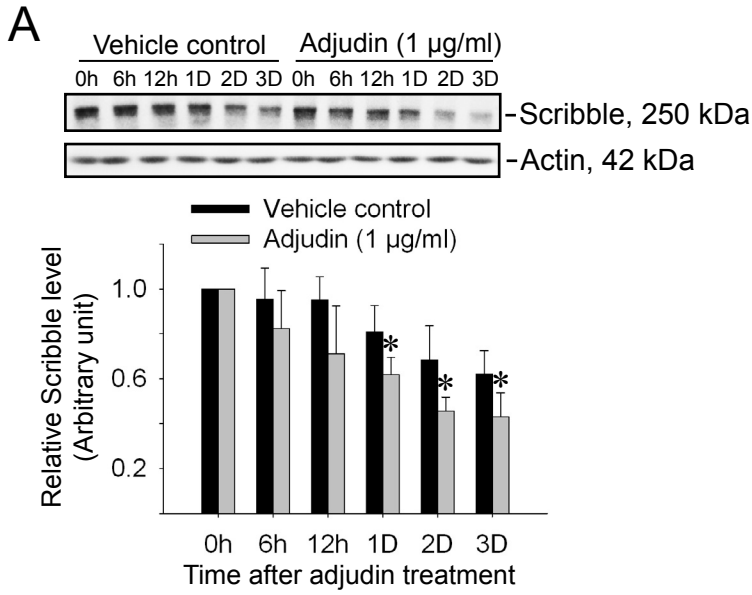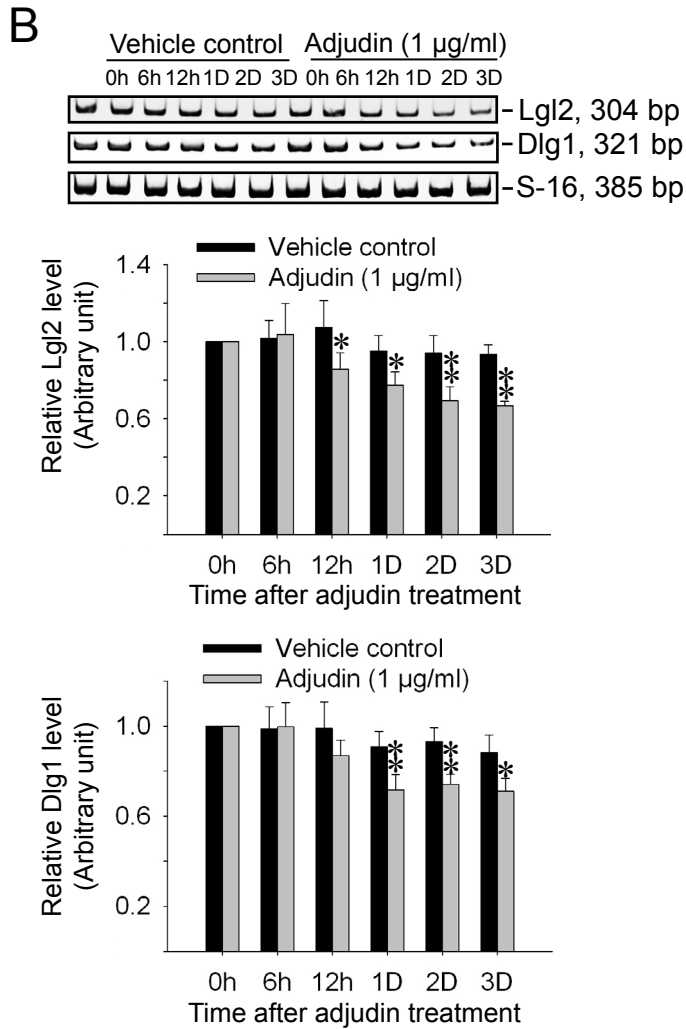

Figure S4 (Su et al.)

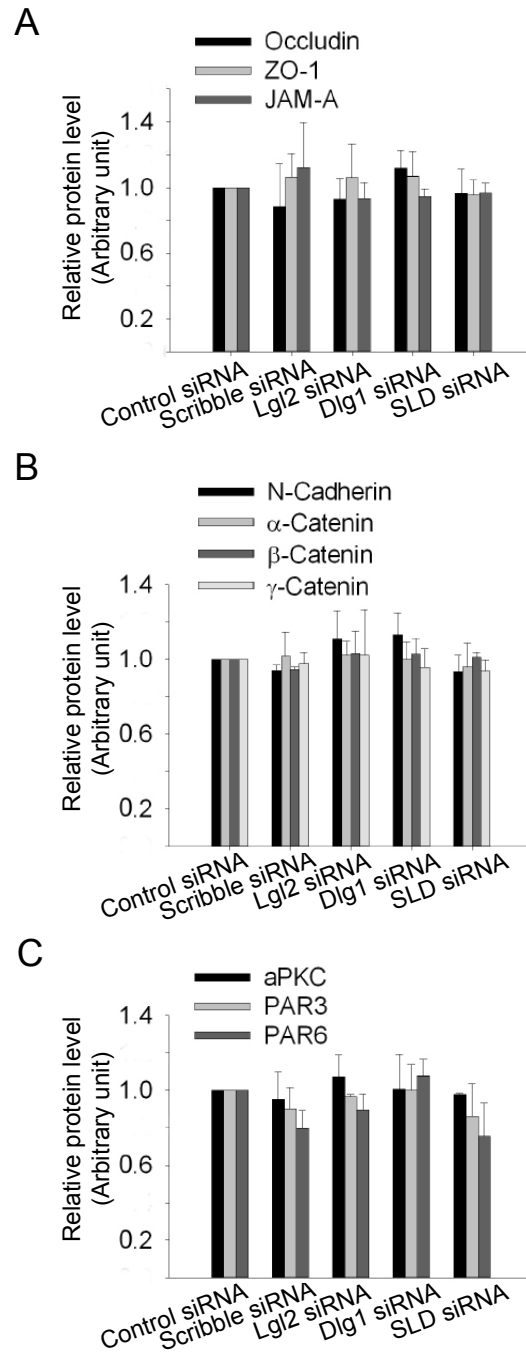

Figure S5 (Su et al.)

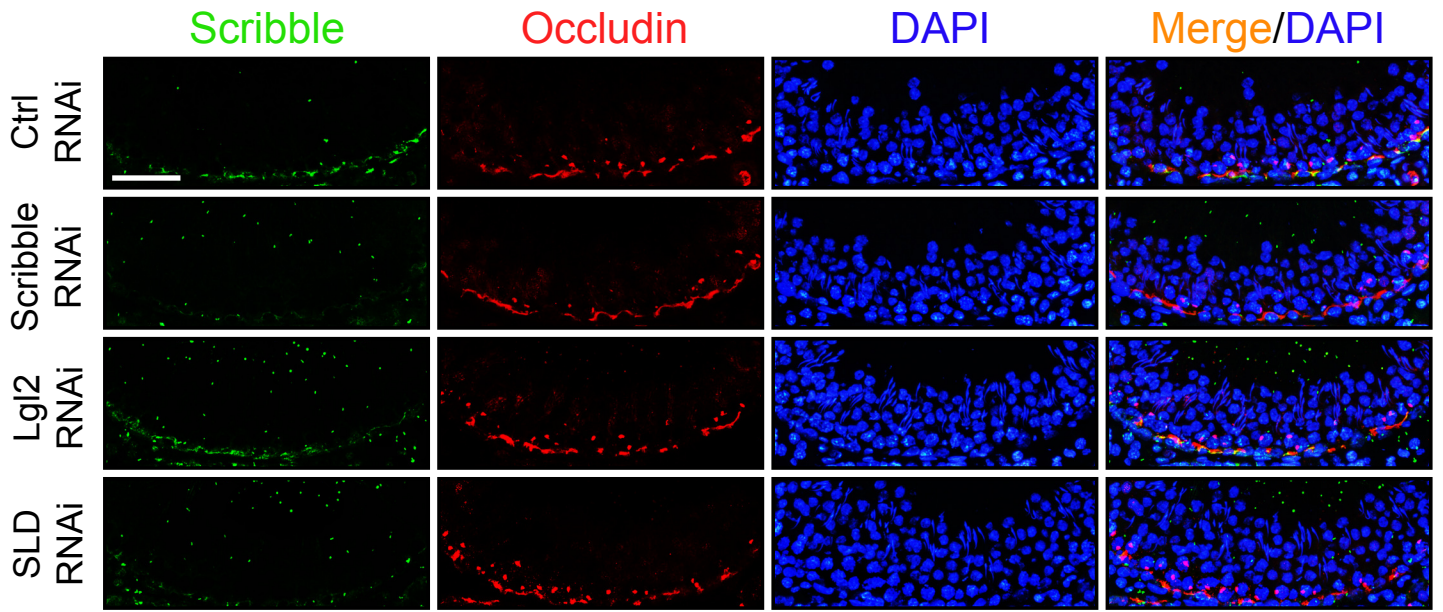

**Table S1. Antibodies used for different experiments in this report\***

| Antibody           | Host species | Vendor                       | Catalog Number | Working |       | Conjugation     |
|--------------------|--------------|------------------------------|----------------|---------|-------|-----------------|
|                    |              |                              |                | IB      | IF    |                 |
| Scribble           | Goat         | Santa Cruz Biotechnology     | sc-11048       | 1:500   | 1:50  | -               |
| aPKC               | Rabbit       | Santa Cruz Biotechnology     | sc-216         | 1:200   |       | -               |
| Par3               | Rabbit       | Upstate Biotechnology        | 07-330         | 1:500   |       | -               |
| Par6               | Rabbit       | Abcam                        | ab45394        | 1:1,000 |       | -               |
| Occludin           | Rabbit       | Zymed/Invitrogen             | 71-1500        | 1:250   | 1:50  | -               |
| ZO-1               | Rabbit       | Zymed/Invitrogen             | 61-7300        | 1:250   | 1:50  | -               |
| JAM-A              | Rabbit       | Zymed/Invitrogen             | 36-1700        | 1:300   |       | -               |
| N-Cadherin         | Rabbit       | Santa Cruz Biotechnology     | sc-7939        | 1:300   |       | -               |
| $\alpha$ -Catenin  | Rabbit       | Santa Cruz Biotechnology     | sc-7894        | 1:250   |       | -               |
| $\beta$ -Catenin   | Rabbit       | Santa Cruz Biotechnology     | sc-7199        | 1:250   | 1:50  | -               |
| $\gamma$ -Catenin  | Mouse        | BD Transduction Laboratories | 610254         | 1:1,000 |       | -               |
| Erk1/2             | Rabbit       | Cell Signaling               | 4695           | 1:1,000 |       | -               |
| pErk1/2            | Rabbit       | Cell Signaling               | 4370           | 1:1,000 |       | -               |
| Actin              | Goat         | Santa Cruz Biotechnology     | sc-1616        | 1:250   |       | -               |
| Laminin $\gamma$ 3 | Rabbit       | Cheng Lab (1).               |                |         | 1:50  | -               |
| Rabbit IgG         | Bovine       | Santa Cruz Biotechnology     | sc-2370        | 1:3000  |       | HRP             |
| Goat IgG           | Bovine       | Santa Cruz Biotechnology     | sc-2350        | 1:3000  |       | HRP             |
| Mouse IgG          | Bovine       | Santa Cruz Biotechnology     | sc-2371        | 1:3000  |       | HRP             |
| Goat IgG           | Donkey       | Invitrogen                   | A11055         |         | 1:100 | Alexa Fluor 488 |
| Rabbit IgG         | Donkey       | Invitrogen                   | A21206         |         | 1:100 | Alexa Fluor 488 |
| Rabbit IgG         | Donkey       | Invitrogen                   | A31572         |         | 1:100 | Alexa Fluor 555 |

\* IB, immunoblotting; IF, immunofluorescence microscopy. It is noted that all the antibodies cross-reacted with the corresponding proteins in rat as indicated by the manufacturer and tested in our laboratory in preliminary experiments. It is noted that for the anti-laminin  $\gamma$ 3 antibody (IgG purified by sequential ammonium sulfate precipitation and DEAE anion-exchange chromatography), it was raised in a rabbit using purified recombinant rat laminin  $\gamma$ 3 fragment (Yan and Cheng, 2006).

## Reference

1. Yan, H. H. N. and Cheng, C. Y. (2006) Laminin  $\alpha$ 3 forms a complex with  $\beta$ 3 and  $\gamma$ 3 chains that serves as the ligand for  $\alpha$ 6 $\beta$ 1-integrin at the apical ectoplasmic specialization in adult rat testes. *J Biol Chem* **281**: 17286-17303.



**Table S2. Primers used for RT-PCR and qPCR experiments in this report**

| <b>Gene</b> | <b>GenBank accession number</b> | <b>Primer orientation</b> | <b>Primer sequence (5'-3')</b>  | <b>Nucleotides position</b> | <b>Expected size (b.p.)</b> |
|-------------|---------------------------------|---------------------------|---------------------------------|-----------------------------|-----------------------------|
| Scribble    | XM_002726943.1                  | sense                     | 5'- CTGGCACTGCTCACAGATCT -3'    | 724-743                     | 257 bp                      |
|             |                                 | antisense                 | 5'- AGCACCTCAAGATGATTCCG -3'    | 961-980                     |                             |
| Lgl2        | NM_001127549.1                  | sense                     | 5'- TCCACCATCTCGAACACTCG -3'    | 442-461                     | 304 bp                      |
|             |                                 | antisense                 | 5'- TGCTGGATGACAACAGCCTG -3'    | 726-745                     |                             |
| Dlg1        | NM_012788.1                     | sense                     | 5'- GTTGACCTCAGAGCTGCAAG -3'    | 2000-2019                   | 321 bp                      |
|             |                                 | antisense                 | 5'- CCACCACTCGTCATCAGAAG -3'    | 2301-2320                   |                             |
| S-16        | NM_001169146.1                  | sense                     | 5'-TCCGCTGCAGTCCGTTCAAGTCTT-3'  | 87-110                      | 385 bp                      |
|             |                                 | antisense                 | 5'-GCCAAACTTCTTGGATTTCGCAGCG-3' | 448-471                     |                             |
